# Supplementary material for: Proteochemometric Modeling of the Susceptibility of Mutated Variants of the HIV-1 Virus to Reverse Transcriptase Inhibitors
Source: PubMed Central journal article supplement (PMC3002298; doi:10.1371/journal.pone.0014353), 2010-12-15
Supplement: pone.0014353.s001.pdf [file pone.0014353.s001.pdf]

**Table S1:** List of 58 molecular descriptor types calculated by dragon 2.1 software (Talete S.r.l) used in proteochemometrics modeling of NRTI susceptibilities for HIV-1 reverse transcriptases.

| Nr. | Symbol            | Meaning                                                    |
|-----|-------------------|------------------------------------------------------------|
| 1   | MW                | Molecular weight                                           |
| 2   | AMW               | Average Molecular weight                                   |
| 3   | Ss                | Sum of Kier H all electrotopological states                |
| 4   | Mv                | Mean atomic van der Waals volume (scaled on C atom)        |
| 5   | Me                | Mean atomic Sanderson electronegativity (scaled on C atom) |
| 6   | Mp                | Mean atomic polarizability (scaled on C atom)              |
| 7   | Ms                | Mean electrotopological state                              |
| 8   | nAT               | number of atoms                                            |
| 9   | nBO               | Number of non-H bonds                                      |
| 10  | nCIR              | Number of circuits                                         |
| 11  | RBN               | Number of rotatable bonds                                  |
| 12  | RBF               | Rotatable bond fraction                                    |
| 13  | nDB               | Number of double bonds                                     |
| 14  | nC                | number of Carbon atoms                                     |
| 15  | nN                | Number of Nitrogen atoms                                   |
| 16  | nS                | Number of Sulfur atoms                                     |
| 17  | nR05              | Number of 5-membered rings                                 |
| 18  | Qmean             | Mean absolute charge (charge polarization)                 |
| 19  | Q <sup>2</sup>    | Total squared charge                                       |
| 20  | RPCG              | relative positive charge                                   |
| 21  | TE2               | Topographic electronic descriptor (bond restricted)        |
| 22  | LDip              | Local dipole index                                         |
| 23  | MAXDN             | Maximal electrotopological negative variation              |
| 24  | MAXDP             | Maximal electrotopological positive variation              |
| 25  | TIE               | E-state topological parameter                              |
| 26  | RGyr              | Radius of gyration (Mass weighted)                         |
| 27  | SPAN              | Span R                                                     |
| 28  | SPAM              | Average Span R                                             |
| 29  | SPH               | Sphericity                                                 |
| 30  | ASP               | Asphericity                                                |
| 31  | FDI               | Folding degree index                                       |
| 32  | PJI3              | 3D Petijean shape index                                    |
| 33  | G(N..N)           | Sum of geometrical distances between N..N                  |
| 34  | G(O..O)           | Sum of geometrical distances between O..O                  |
| 35  | nCp               | Number of total primary C(sp <sup>3</sup> )                |
| 36  | nCrH <sub>2</sub> | Number of ring secondary C(sp <sup>3</sup> )               |

|    |                  |                                                                                                                                               |
|----|------------------|-----------------------------------------------------------------------------------------------------------------------------------------------|
| 37 | nCrHR            | Number of ring tertiary C(sp <sup>3</sup> )                                                                                                   |
| 38 | nCONHR           | Number of secondary amides (aliphatic)                                                                                                        |
| 39 | nNH <sub>2</sub> | Number of primary amines (aliphatic)                                                                                                          |
| 40 | nHDon            | Number of donor atoms for H-bonds (with N and O)                                                                                              |
| 41 | nHAcc            | Number of acceptor atoms for H-bonds (with N and O)                                                                                           |
| 42 | C-002            | CH <sub>2</sub> R <sub>2</sub>                                                                                                                |
| 43 | C-008            | CHR <sub>2</sub> X                                                                                                                            |
| 44 | C-024            | R--CH--R                                                                                                                                      |
| 45 | C-029            | R--CX--X                                                                                                                                      |
| 46 | C-030            | X--CH--X                                                                                                                                      |
| 47 | H-047            | H attached to C <sup>1</sup> (sp <sup>3</sup> ) / C <sup>0</sup> (sp <sup>2</sup> )                                                           |
| 48 | H-048            | H attached to C <sup>2</sup> (sp <sup>3</sup> ) / C <sup>1</sup> (sp <sup>2</sup> ) / C <sup>0</sup> (sp)                                     |
| 49 | H-049            | H attached to C <sup>3</sup> (sp <sup>3</sup> ) / C <sup>2</sup> (sp <sup>2</sup> ) / C <sup>3</sup> (sp <sup>2</sup> ) / C <sup>3</sup> (sp) |
| 50 | H-052            | H attached to C <sup>0</sup> (sp <sup>3</sup> ) with 1X attached to next Carbon                                                               |
| 51 | H-053            | H attached to C <sup>0</sup> (sp <sup>3</sup> ) with 2X attached to next Carbon                                                               |
| 52 | N-069            | Ar-NH <sub>2</sub> / X-NH <sub>2</sub>                                                                                                        |
| 53 | N-072            | RCO-N< / >N-X=X                                                                                                                               |
| 54 | Ui               | Unsaturation index                                                                                                                            |
| 55 | ARR              | Aromatic ratio                                                                                                                                |
| 56 | MR               | Ghose-Crippen molar refractivity                                                                                                              |
| 57 | PSA              | Fragment-based polar surface area                                                                                                             |
| 58 | MLOGP            | Moriguchi octanol-water partition coefficient (logP)                                                                                          |
